# Supplementary material for: Oxidative Stress as a Contributor to Insulin Resistance in the Skeletal Muscles of Mice with Polycystic Ovary Syndrome
Source: MDPI journal article supplement (doi:10.3390/ijms231911384), 2022-09-27
Supplement: s1 [file s1]

# Supplementary Materials:

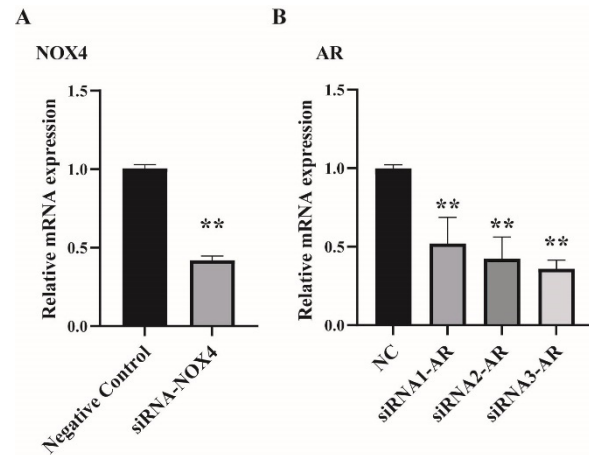

**Supplemental Figure S1.** Determination of the efficiency of siRNA-NOX4 and siRNA-AR in C2C12 cells. Fully differentiated C2C12 cells were transfected with siRNA-NOX4, siRNA-AR, or non-silencing RNA (NC). Thirty-six hours later, cells were collected and transfection efficiency was determined. (A) quantitative PCR assays of NOX4 mRNA levels. (B) quantitative PCR assays of AR mRNA levels. Three siRNA-AR sequences were used, designated siRNA1-AR, siRNA2-AR, and siRNA3-AR. The data are presented as means  $\pm$  SEM of three independent experiments. \*,  $p < 0.05$ , \*\*,  $p < 0.01$ , T, testosterone. AR, androgen receptor.

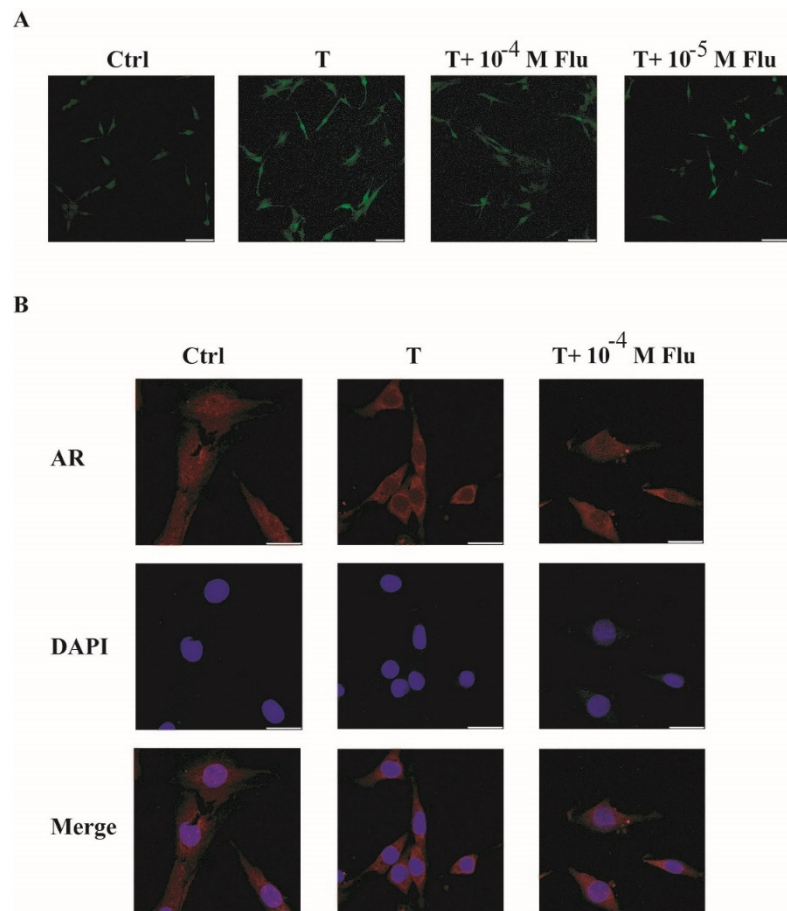

**Supplemental Figure S2.** Effects of flutamide intervention on T-treated C2C12 cells. (A) Representative photomicrographs of intracellular ROS in C2C12 cells.

Fully differentiated C2C12 cells were pretreated with flutamide ( $10^{-4}$  and  $10^{-5}$  M) for 1 h followed by the treatment with T (0,  $10^{-5}$ M) for 12 h. ROS was measured by DCFH-DA staining. Sale bar = 100  $\mu$ m. (B) The subcellular localization of AR. Fully differentiated C2C12 cells were pretreated with flutamide ( $10^{-4}$  M) for 1 h followed by the treatment with T (0,  $10^{-5}$ M) for 12 h. Red: AR; Blue: DAPI. Scale bar = 25  $\mu$ m. T, testosterone; AR, androgen receptor; Flu, flutamide.

**Supplemental Table S1.** Primer sequences used for quantitative RT-PCR

| Gene            | Sequences 5'-3'                                        |
|-----------------|--------------------------------------------------------|
| <i>GAPDH</i>    | F: ATGACATCAAGAAGGTGGTG<br>R: CATACCAGGAAATGAGCTTG     |
| <i>AR</i>       | F: AAGGGAGGTTACGCCAAAGG<br>R: TGCCGTAGTCCAATGGGTTC     |
| <i>NOX4</i>     | F: TGTGGGCCTAGGATTGTGTT<br>R: AGGGACCTTCTGTGATCCTCG    |
| <i>SOD1</i>     | F: CCAGTGCAGGACCTCATTTT<br>R: TTGTTTCTCATGGACCACCA     |
| <i>SOD2</i>     | F: TCTGCAGGGTACAACCATCA<br>R: ACCTCCATCGGGTTGTAGTG     |
| <i>GR</i>       | F: TCCAAGTGGTGACTTCCGTG<br>R: ATGTGGCCCTTTTCATCCGT     |
| <i>NOX2</i>     | F: TGTGGTTGGGGCTGAATGTC<br>R: CTGAGAAAGGAGAGCAGATTTTCG |
| <i>Catalase</i> | F: CACTGACGAGATGGCACACT<br>R: TGTGGAGAATCGAACGGCAA     |
| <i>GPx1</i>     | F: ACAGTCCACCGTGTATGCC<br>R: TCATTCTTGCCATTCTCCTGGTG   |

**Supplemental Table S2.** siRNA sequences targeting AR and NOX4 mRNA

|                       | siRNA Sequences 5'-3'                                   |
|-----------------------|---------------------------------------------------------|
| siRNA1-AR             | F: GACUCAGCUGCCCCAUCCATT<br>R: UGGAUGGGGCAGCUGAGUCTT    |
| siRNA2-AR             | F: CUGGGAAAGUCAAGCCCAUTT<br>R: AUGGGCUUGACUUUCCCAGTT    |
| siRNA3-AR             | F: CCUUUGCUGCCUUGUUAUCUATT<br>R: UAGAUACAAGGCAGCAAAGGTT |
| siRNA-NOX4            | F: GACCUGACUUUGUGAACAUUTT<br>R: AUGUUCACAAAGUCAGGUUCTT  |
| Negative control (NC) | F: UUCUCCGAACGUGUCACGUTT<br>R: ACGUGACACGUUCGGAGAATT    |
